# Supplementary material for: A map of African humid tropical forest aboveground biomass derived from management inventories
Source: PubMed Central journal article supplement (PMC7343822; doi:10.1038/s41597-020-0561-0), 2020-07-08
Supplement: 41597_2020_561_MOESM1_ESM.pdf [file 41597_2020_561_MOESM1_ESM.pdf]

## Supplementary Figures.

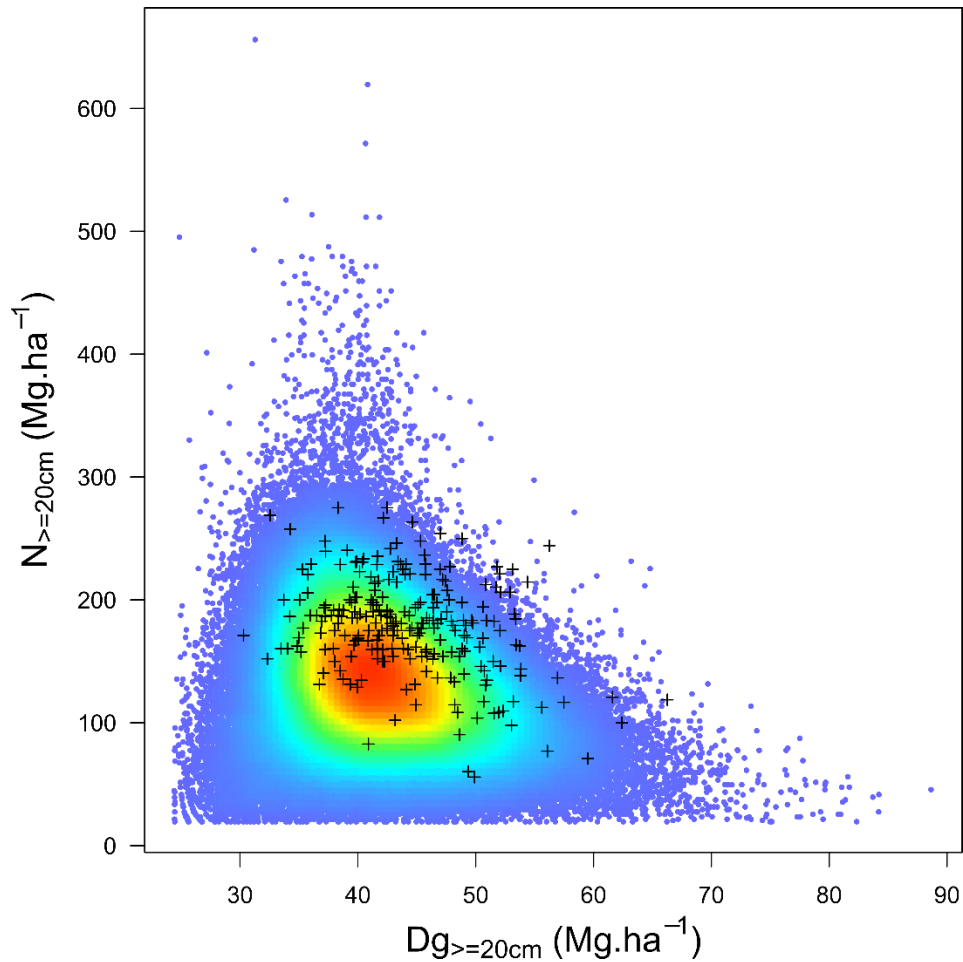

**Supplementary Figure 1. Range of forest structural parameters in 0.5-ha plots from the CoFor (heat color gradient) and scientific (black crosses) datasets.  $N_{>=20}$  and  $Dg_{>=20}$  stands for the number of trees and the quadratic mean tree diameter for trees with diameter at breast height greater or equal than 20 cm, respectively.**
